# Supplementary figures and images for: Sensory defects in Necdin deficient mice result from a loss of sensory neurons correlated within an increase of developmental programmed cell death
Source: Springer Nature journal article supplement (doi:10.1186/1471-213x-6-56), 2006-11-20

# Additional file 2

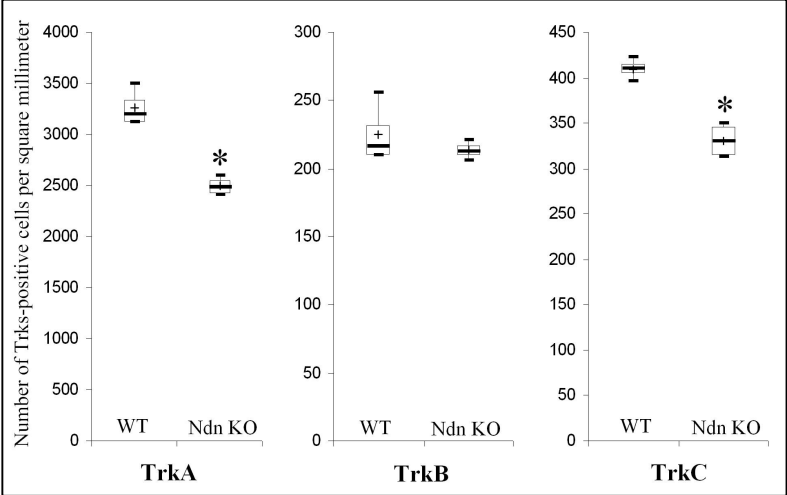

Supplement: Additional file 2 [file 1471-213x-6-56-s2.pdf]
